# Supplementary material
Source: publisher figshare collection journal article supplement (https://gsapubs.figshare.com/articles/dataset/_/13708303)
Supplement: Supplementary file 1 [file 1]

## ADDITIONAL DETAILS ON METHODS

### *Detailed Methods on the Preparing of the Artificial Sandstone Blocks*

We casted mixtures of water, Portland cement and fine sand into boxes of  $0.56 * 0.56 * 0.3 \text{ m}^3$  to create homogeneous artificial sandstone of 0.2 mm grainsize, varying the cement to sand ratio for two different tensile strengths  $\sigma_t$  (Sklar and Dietrich, 2001; Table S1). The block's tensile strengths were measured from samples using a Split-Hopkinson pressure bar (Zhou et al., 2011). For the impact abrasion experiments we placed the blocks on sand bags to reduce shacking and confined them with strapped wood boards to avoid shock wave reflection and block cracking from the free lateral surfaces (Fig. 1B). This procedure served as approximation for lateral infinite massive bedrock (i.e. for constant horizontal lithostatic pressure), at least for the relatively small ratios of impactor size to block size of the experiments.

### *Detailed Methods on Effective Impact Energy Calculation of the Drop Abrasion Experiments*

Having vertical and horizontal scale bars attached to the target blocks (Fig. 1B), we tracked the impacting grains by means of a laterally positioned time-laps camera with 100 frames per second, and calculated effective kinetic impact energies,  $\varepsilon_{kin}$ , responsible for block abrasion:

$$\varepsilon_{kin} = \varepsilon_{imp} - \varepsilon_{reb} = (M_i g H_d) - (\varepsilon_{kin,reb} + \varepsilon_{rot,reb}), \quad (1)$$

with  $\varepsilon_{imp}$  being the kinetic impactor energy at the time of impact,  $\varepsilon_{reb}$  being its rebounding energy afterwards,  $M_i$  the impactor mass,  $g$  acceleration due to gravity, and  $H_d$  the impactor's drop height above the target block (Fig. S1A). Based on time-laps camera observations (Fig. S1B and C),  $\varepsilon_{reb}$  after the first impact was calculated as the combination of rebound kinetic energy  $\varepsilon_{kin,reb}$  and rotational energy  $\varepsilon_{rot,reb}$ :

$$\varepsilon_{kin,reb} = (M_i g H_{reb}) + \left( 0.5 M_i \left( \frac{dx}{dt} \right)^2 \right), \quad (2)$$

$$\varepsilon_{rot,reb} = 0.5M_i \left(\frac{D_i}{2}\right)^2 v_{rot,reb}^2, \quad (3)$$

with maximum impactor rebound height  $H_{reb}$ , first rebound hop distance and time  $dx$  and  $dt$ , the impactor's rebound rotation velocity  $v_{rot,reb}$ , and the impactor's diameter  $D_i$  (Fig. S1A). We could mostly avoid second impacts on the blocks, but the few happening did neither contribute notable impact energies, nor measurable total abrasion volumes  $V_a$  or fragment volumes  $V_{frag}$ . Further, we assumed dominance of plastic deformation (abrasion) for the brittle target blocks and neglected any energy loss due to elastic energy radiation (Farin et al., 2015).

## ***Detailed Methods on Total Slab Abrasion Measurements***

After each drop experiment and after removing abraded sand and fragments from the target block (Fig. 2A), we placed sub-millimeter-calibrated CHI photogrammetry scale bars (*SfM* bars) on the block's surface, outside the impact area. Then we took five high-resolution photos (42 Megapixels) around and atop the block using a SONY  $\alpha$ 7RII DSLR camera with a fixed 55 mm lens (Fig. 1B). Applying structure from motion, *SfM*, and multi view stereo photogrammetry in Agisoft Photoscan (Agisoft Photoscan, 2018) resulted in sequential sub-millimeter resolved and accurate digital elevation models, *DEMs*. Vertically differencing these individual epoch *DEMs* in cloudcompare (CloudCompare, 2019), we calculated total abrasion volumes  $V_a$  (i.e. the sum of wear and macro-abrasion  $V_{frag}$ ) for all experiments.

### *Detailed Methods on Compilation of Single Grain Impact Abrasion Data from the Literature*

We compiled published bulk abrasion data from grain drop experiments and from abrasion mill runs (Table S2), all of which didn't report on observed fragment production. For the abrasion mill data, we used an updated version of the total load model (Lamb et al., 2008; neglecting the cover term) to calculate mean effective impact energies,  $\varepsilon_{kin}$ , and mean eroded volumes,  $V_a$ , per single impact in the mills. Thereby, instead of estimating the near-bed volumetric sediment concentration,  $c_b$ , from total volumetric sediment flux (Lamb et al., 2008 eq.18), we based its calculation on the known total sediment mass,  $M_m$ , in the mills:

$$M_m = \int_0^{H_m} \rho_s c(z) r_w L_c dz, \quad (4)$$

with  $H_m$  being the mill's water depth,  $\rho_s$  is the grain sediment density,  $c(z)$  is the volumetric sediment concentration at height  $z$  above the bedrock disk on the mill's bottom,  $r_w$  is the total radial width of the bedrock disk, and  $L_c$  is the mean circumferential travel distance of a grain in the abrasion mill. By transforming eq. 4 and adopting the thickness of the bedload layer  $H_b$  (Sklar and Dietrich, 2004 eq.12), we obtained:

$$\frac{M_m}{\rho_s r_w L_c} = c_b \int_0^{H_m} \frac{c(z)}{c_b} dz = c_b \left[ H_b + \int_{H_b}^{H_m} \frac{c(z)}{c_b} dz \right], \quad (5)$$

and hence:

$$c_b = \frac{M_m}{\rho_s r_w L_c \left[ H_b + \int_{H_b}^{H_m} \frac{c(z)}{c_b} dz \right]}, \quad (6)$$

wherein the second term in the square bracket is the Rouse profile (Lamb et al., 2008 eq.26). For the associated Rouse parameter, we used a proportionally constant of 2.5 and a Stokes number of 90 to account for viscous dampening (generally following Scheingross et al., 2014). Mean kinetic impact energies,  $\varepsilon_{kin}$ , and mean eroded volumes,  $V_a$ , of single grain impacts were then calculated as follows:

$$\varepsilon_{kin} = 0.5M_i\varepsilon_{imp,eff}^2, \quad (7)$$

$$V_a = \frac{V_d}{I_r A_d} = \frac{V_d}{\left(\frac{0.36c_b \varepsilon_{imp,eff}}{V_i}\right) * A_d}, \quad (8)$$

with  $V_d$  being the reported total abraded disk volume,  $I_r$  is the particle impact rate per disk area,  $A_d$  (Lamb et al., 2008 eq.12),  $V_i$  is the mean single impacting grain volume, and  $\varepsilon_{imp,eff}$  is the effective, vertical grain impact energy accounting for turbulent fluctuations (Lamb et al., 2008 eq.35). Principally, abrasion volume scales with excess impact energy (vertical component of the impact velocity minus a material-specific threshold), but this reduction is neglected here due to generally low thresholds and for the case of mean values for  $V_a$  (Neilson, 1968; Engel, 1978; Sklar and Dietrich, 2004).

## ***Detailed Methods on Compilation of Potential Grain Impact Energy in Bedrock Rivers***

The potentially median transportable grain size  $D_{50}$  (the grainsize of 50% volumetric abundance in a grainsize distribution) for a given river bed slope  $S$  and water discharge depths  $H$  can be calculated as:

$$D_{50} = \frac{\tau_b}{(\rho_s - \rho_w) g \tau_b^*}, \quad (9)$$

where  $\rho_s$  and  $\rho_w$  are the densities of sediment and water,  $\tau_b = \rho_w g H S$  is bed shear stress and  $\tau_b^*$  is its non-dimensional form (the Shields number). The latter value for a bankfull discharge is gained from:

$$\tau_b^* = 1.5 \tau_{bc}^* = 0.225 S^{0.25}, \quad (10)$$

based on two observations: (i) the general relation between  $\tau_b^*$  and its critical value  $\tau_{bc}^*$  for the onset of sediment motion (i.e., the Shields stress; Parker 1978), and (ii) the dependence of  $\tau_{bc}^*$  on channel slope (Lamb et al., 2008b). Following Lamb et al., 2008, we scaled both volumetric sediment supply (based on Fernandez Luque and van Beek, 1976) and the flow roughness parameter  $D_{50}$ , and calculated potential bed impact energies  $\varepsilon_{kin}$  of  $D_{50}$  using the total load model (Lamb et al., 2008; including the sediment cover term), varying both  $S$  and  $H$ . This procedure presumes this model's validity also for large grain sizes (i.e. valid calculation of bedload layer thickness, bedload transport and settling velocities), and that the grains follow the fluid.

From literature, we compiled a data set on bedrock river sections, comprising riverbed slope  $S$ , flow depth  $H$ , bedrock type and tensile strength  $\sigma_t$ , and measured grainsizes, as available (Table S3). For cases of not reported  $\sigma_t$ , but descriptions of the local rock type, we adapted  $\sigma_t$  values of comparable rock samples, as measured by Sklar and Dietrich (2001). Reported values

of Schmidt Hammer measurements  $SH$  were converted to  $\sigma_t$  using the following conversion (Jamshidi et al., 2018):

$$\sigma_t = 0.0347 \cdot 10^6 \cdot SH^{1.3783} \quad (11)$$

Based on the given slopes  $S$  and flow depths  $H$  of the bedrock rivers, we then calculated transportable median grainsizes,  $D_{50}$ , and related effective impact energies,  $\varepsilon_{kin}$ , following the total load model procedure described above. The predicted  $D_{50}$  mostly exceeded reported  $D_{50}$ , but were consistent with maximum observed boulder sizes,  $D_{max}$ , which already move under partial submergence (Carling et al., 2002; Fujioka et al., 2015; Alexander and Cooker, 2016). Using the rock tensile strengths,  $\sigma_t$ , we obtained potential bedrock abrasion volumes  $V_a$  for the  $D_{50}$  grains by means of the extended erosivity regression (Fig. 3). Considering mean kinetic impact energy densities ( $\varepsilon_{kin} / D_{50}^2$ ) and the assumed threshold for the onset of macro-abrasion (Fig. 2C), we then assigned the river sections to fall into the wear- and macro-abrasion regimes, respectively (Fig. 4).

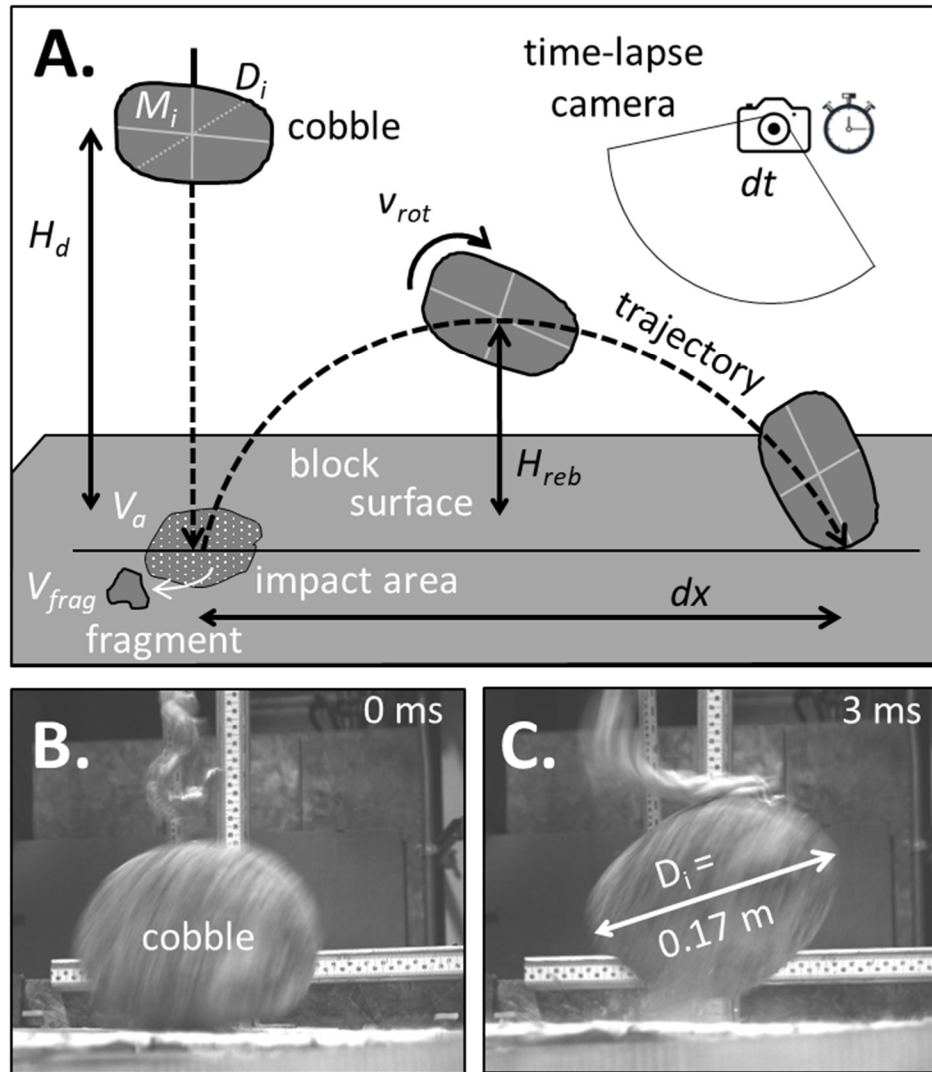

112 **Figure S1.** Impactor trajectory measurements shown for a dropped cobble (cf. Fig. 1B) with (A)  
 113 definitions of the measured impactor values (mass  $M_i$ , diameter  $D_i$ , drop height  $H_d$ , rebound  
 114 height  $H_{reb}$ , rebound rotation velocity  $v_{rot,reb}$ , hop distance  $dx$  and hop time  $dt$ ), block abrasion  
 115 volume  $V_a$  and fragment abrasion volume  $V_{frag}$ , and (B-C) time-lapse snapshots in microseconds  
 116 of a cobble before and after its impact on a block's surface.



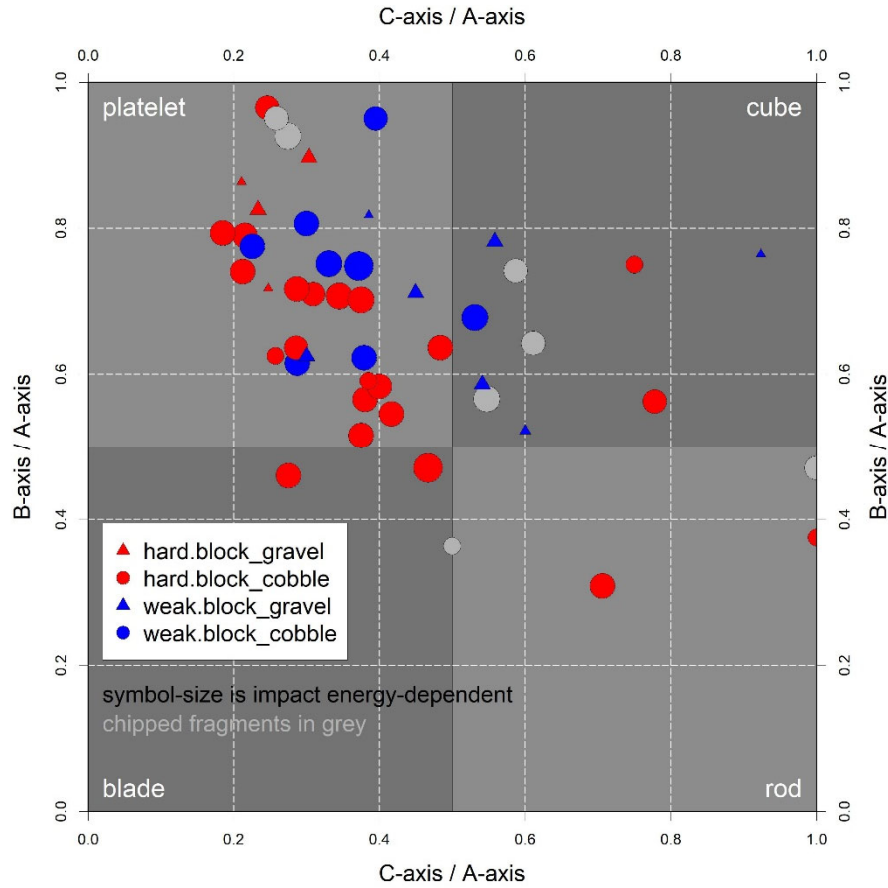

**Figure S2.** Size relations of the largest fragments abraded per impact experiment, shown in the framework of grain shape types (represented by four sectors with mainly platelet, cube, blade or rod shape). Defining their ABC-axis by decreasing lengths, most abraded fragments were of platelet-shape with size relations of C-axis/A-axis smaller than 0.5 and B-axis/A-axis larger than 0.5.

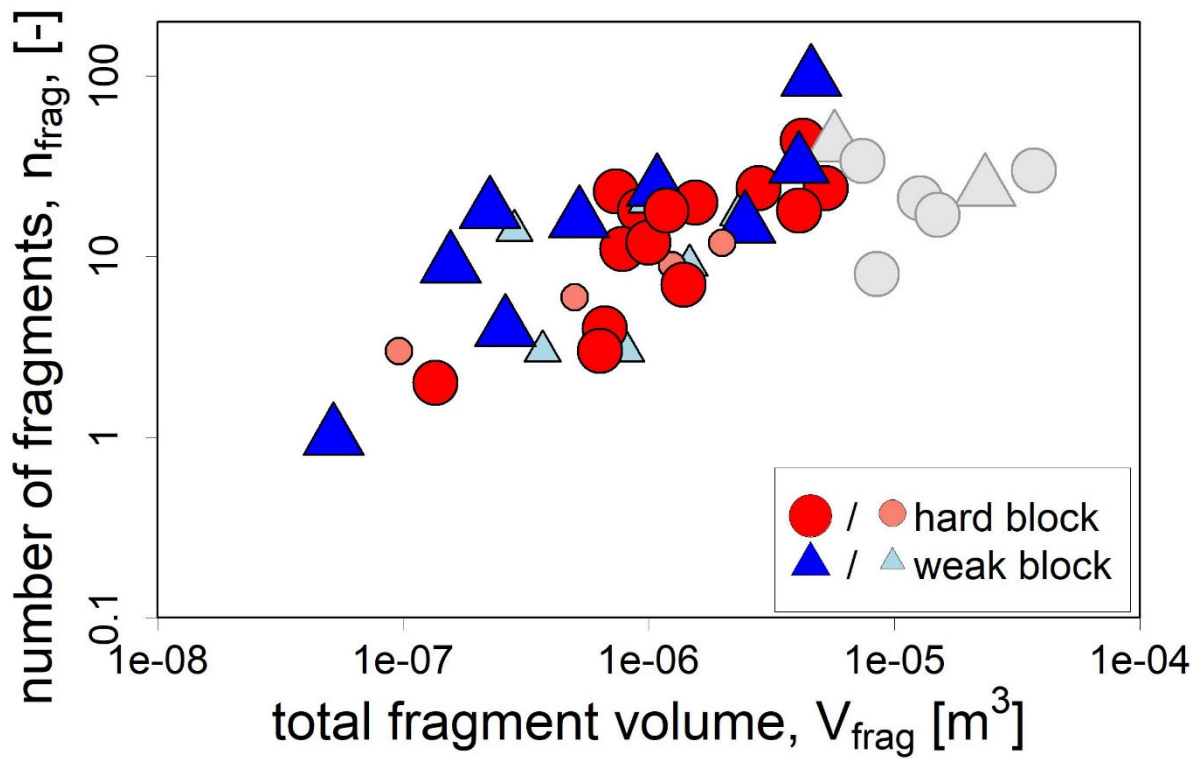

124 **Figure S3.** The increase in total fragment volume,  $V_{frag}$ , for higher impact energies was due to an  
 125 increase of the number of fragments,  $n_{frag}$ , independent of the impactor size (represented by small  
 126 and large symbols) or target strength (represented by color). Light grey-shaded symbols show  
 127 chipped fragments.

128

**Table S1.** Overview of the macro-abrasion drop experiments. Individual runs during all seven experimental sets equal the number of structure from motion,  $SfM$ , models (62). Grey-shaded background denote variables hold constant and bold numbers show varied variables of impactor type (cobble versus pebbles), impactor mass,  $M_i$ , and impactor drop height,  $H_d$  (Fig. S1A). The tensile strengths,  $\sigma_t$ , of the concrete blocks (conditioned by their cement to sand mixture ratio) was measured using a Split-Hopkinson pressure bar and conform to published values of the same artificial rock material (Sklar and Dietrich, 2001).

| exp. set | target                         |                                  | impactor(s) |                           |                          | runs                 |             |                      |
|----------|--------------------------------|----------------------------------|-------------|---------------------------|--------------------------|----------------------|-------------|----------------------|
|          | casting ratio<br>cement : sand | tensile strength<br>$\tau$ [Mpa] | type        | single mass<br>$M_i$ [kg] | drop height<br>$H_d$ [m] | impacts<br>frequency | repetitions | no. of<br>SfM models |
| 1        | 1 : 2<br>(hard)                | 2.34                             | cobble      | 11.8                      | <b>0.50 - 1.50</b>       | 1                    | 3           | 12                   |
| 2        |                                |                                  |             |                           | <b>0.50 - 4.87</b>       | 5 (1)                | 1           | 8                    |
| 3        |                                |                                  | pebbles     | <b>0.3 - 0.5</b>          | 2.40                     |                      | 2           | 4                    |
| 4        | 1 : 4<br>(weak)                | 1.32                             | cobble      | 11.8                      | <b>0.10 - 4.87</b>       |                      | 1           | 13                   |
| 5        |                                |                                  | pebbles     | <b>0.1 - 0.5</b>          | 2.40                     |                      |             | 7                    |
| 6        |                                |                                  |             | 0.3                       |                          |                      | 24          | 3                    |
| 7        |                                |                                  |             | <b>0.3 - 0.5</b>          |                          |                      | 21          | 1                    |
|          |                                |                                  |             | constant value            |                          | varied value         |             |                      |

138 **Table S2.** Reported bedrock abrasion experiment data sets with calculated magnitudes of  
 139 effective single grain impact energies,  $\epsilon_{kin}$ , and abraded target volumes,  $V_a$ . The diameter  
 140  $D_{ero,sphere}$  of equivalent abraded spheres with volume  $V_a$  is given for illustration, only.

| experiments     |                                     |                | orders of magnitudes for single grain impacts |                       |                         |                                      | source                   |
|-----------------|-------------------------------------|----------------|-----------------------------------------------|-----------------------|-------------------------|--------------------------------------|--------------------------|
| impactor        | target                              | test principle | impactor mass                                 | kinetic impact energy | abraded target volume   | diameter of equiv. sphere with $V_a$ |                          |
|                 |                                     |                | $M_i$ [kg]                                    | $\epsilon_{kin}$ [J]  | $V_a$ [m <sup>3</sup> ] | $D_{ero,sphere}$ [m]                 |                          |
| Crystolon dust  | plate glass                         | sand blasting  | 1e-9                                          | 1e-7 to 1e-8          | 1e-16 to 1e-15          | 1e-5                                 | Head and Harr, 1970      |
| steel balls     | concretes with varying aggregates   | abrasion mill  | 1e-3 to 1e-2                                  | 1e-3                  | 1e-13 to 1e-12          | 1e-4 to 1e-5                         | Liu, 1981                |
| sand, pebbles   | natural rocks, artificial sandstone | abrasion mill  | 1e-7 to 1e-2                                  | 1e-9 to 1e-2          | 1e-18 to 1e-11          | 1e-6 to 1e-4                         | Sklar and Dietrich, 2001 |
| pebbles         | artificial sandstone                | grain drop     | 1e-2                                          | 1e-1                  | 1e-9                    | 1e-3                                 | Sklar and Dietrich, 2004 |
| sand, pebbles   | polyurethane foam                   | abrasion mill  | 1e-7 to 1e-1                                  | 1e-11 to 1e-2         | 1e-19 to 1e-11          | 1e-7 to 1e-4                         | Scheingross et al., 2014 |
| pebbles, cobble | artificial sandstone                | grain drop     | 1e-1 to 1e1                                   | 1e0 to 1e2            | 1e-7 to 1e-5            | 1e-3 to 1e-2                         | this study               |

142 **Table S3.** Compiled set of published bedrock river data (slope  $S$ , water depth  $H$ , measured grain  
143 sizes  $D$ , and partially rock tensile strength  $\sigma_t$ ) and predicted values of potential streamflow  
144 erosivity, sorted by year of publication and order in the original publication. Note several  
145 sections per listed rivers and partly converted or assumed tensile strengths.

146

## 147 REFERENCES CITED

- 148 AgiSoft PhotoScan Professional (Version 1.4.5; Software), 2018: retrieved from  
 149 <http://www.agisoft.com/downloads/installer/>
- 150 Alexander, J., and Cooker, M.J., 2016, Moving boulders in flash floods and estimating flow  
 151 conditions using boulders in ancient deposits: *Sedimentology*, v. 63, p. 1582-1595,  
 152 <https://doi.org/10.1111/sed.12274>
- 153 Alho, P., Russel, A.J., Carrivick, J.L., and Kaeyhkoe, J., 2005, Reconstruction of the largest  
 154 Holocene joekulhlaup within Joekulsa a Fjoellum, NE Iceland: *Quaternary Science*  
 155 *Reviews*, v. 24, p. 2319-2334, <https://doi.org/10.1016/j.quascirev.2004.11.021>
- 156 Baker, V.R. and Pickup, G., 1987, Flood geomorphology of the Katherine Gorge, Northern  
 157 Territory, Australia, *GSA Bulletin*, v. 98, p. 635-646, [https://doi.org/10.1130/0016-](https://doi.org/10.1130/0016-7606(1987)98<635:FGOTKG>2.0.CO;2)  
 158 [7606\(1987\)98<635:FGOTKG>2.0.CO;2](https://doi.org/10.1130/0016-7606(1987)98<635:FGOTKG>2.0.CO;2)
- 159 Baker, V.R. and Kale, V.S., 1998, The Role of Extreme Floods in Shaping Bedrock Channels, *in*  
 160 Tinkler, K.J., and Wohl, E.E., eds., *Rivers Over Rock: Fluvial Processes in Bedrock*  
 161 *Channels: American Geophysical Union Geophysical Monograph 107*, p. 153-165,  
 162 <https://doi.org/10.1029/GM107p0153>
- 163 Carling, P.A., Hoffmann, M., and Blatter, A.S., 2002, Initial Motion of Boulders in Bedrock  
 164 Channels, *in* House, P.K., Webb, R.H., Baker, V.R., and Levish, D.R., eds, *Ancient Floods,*  
 165 *Modern Hazards, American Geophysical Union Water Science and Application*, v. 5, p.  
 166 147-160, <https://doi.org/10.1029/WS005p0147>
- 167 CloudCompare (version 2.11; GPL software), 2019: retrieved from <http://www.cloudcompare.org>
- 168 Farin, M., Mangeney, A., de Rosny, J., Toussaint, R., Sainte-Marie, J., and Shapiro, N.M., 2016,  
 169 Experimental validation of theoretical methods to estimate the energy radiated by elastic  
 170 waves during an impact: *Journal of Sound and Vibration*, v. 362, p. 176-202,  
 171 <https://doi.org/10.1016/j.jsv.2015.10.003>
- 172 Fernandez Luque, R., and van Beek, R., 1976, Erosion and transport of bed-load sediment: *Journal of*  
 173 *Hydraulic Research*, v. 14 (2), p. 127– 144, <https://doi.org/10.1080/00221687609499677>
- 174 Fujioka, T., Fink, D., Nanson, G., Mifsud, C., and Wende, R., 2015, Flood-flipped boulders: In-situ  
 175 cosmogenic nuclide modeling of flood deposits in the monsoon tropics of Australia:  
 176 *Geology*, v.43 (1), p. 43-46, <https://doi.org/10.1130/G35856.1>
- 177 Jamshidi, A., Yazarloo, R., and Gheiji, S., 2018, Comparative evaluation of Schmidt hammer test  
 178 procedures for prediction of rock strength: *International Journal of Mining and Geo-*  
 179 *Engineering*, v. 52 (2), p. 199-206, <https://doi.org/10.22059/ijmge.2018.244154.594702>
- 180 Lamb, M.P., Dietrich, W.E., and Venditti, J.G., 2008b, Is the critical Shields stress for incipient  
 181 sediment motion dependent on channel-bed slope?: *Journal of Geophysical Research*, v. 113,  
 182 F02008, <https://doi.org/10.1029/2007JF000831>
- 183 Neilson, J.H. and Gilchrist, A., 1968, Erosion by a stream of solid particles: *Wear*, v. 11 (2), p. 111-  
 184 122, [https://doi.org/10.1016/0043-1648\(68\)90591-7](https://doi.org/10.1016/0043-1648(68)90591-7)
- 185 Parker, G., 1978, Self-formed straight rivers with equilibrium banks and mobile bed. Part 2. The  
 186 gravel river: *Journal of Fluid Mechanics*, v. 89 (1), p. 127– 146,  
 187 <https://doi.org/10.1017/S0022112078002505>

188 Zhou, Y.X., Xia, K., Li, X.B., Li, H.B., Ma, G.W., Zhao, J., Zhou, Z.L., and Dai, F., 2011, Suggested  
189 Methods for Determining the Dynamic Strength Parameters and Mode-I Fracture Toughness  
190 of Rock Materials, *in* Ulusay, R., eds, The ISRM Suggested Methods for Rock  
191 Characterization, Testing and Monitoring: 2007–2014. Springer, Cham, p. 35-44,  
192 [https://doi.org/10.1007/978-3-319-07713-0\\_3](https://doi.org/10.1007/978-3-319-07713-0_3)

193
